# Supplementary material for: Electro-elastocapillary Rayleigh–plateau instability in dielectric elastomer films
Source: Royal Society of Chemistry journal article supplement (doi:10.1039/c7sm00917h), 2017-01-01
Supplement: c7sm00917h5.pdf [file c7sm00917h5.pdf]

## Explanation of Supplemental Videos

- Movie\_1.mov: illustration of electro-elastocapillary buckling instability for  $\bar{\gamma} = 1.85$ .
- Movie\_2.mov: illustration of electro-elastocapillary Rayleigh-Plateau instability for  $\bar{\gamma} = 2.1$ .
- Movie\_3.mov: illustration of finite wavelength Rayleigh-Plateau instability for a constant voltage loading of  $\bar{\Phi} > \bar{\Phi}_c$ , where  $\bar{\Phi} = 4$  and  $\bar{\gamma} = 20$ .
- Movie\_4.mov: illustration of finite wavelength Rayleigh-Plateau instability for a constant voltage loading of  $\bar{\Phi} > \bar{\Phi}_c$ , where  $\bar{\Phi} = 4$  and  $\bar{\gamma} = 5$ .
